# Supplementary material for: One-pot preparation of surface modified boehmite nanoparticles with rare-earth cyclen complexes
Source: Royal Society of Chemistry journal article supplement (doi:10.1039/b704650b), 2007-01-01

### 1,4,7-Tris(*tert*-butoxycarbonylmethyl)-1,4,7,10-tetraazacyclododecane

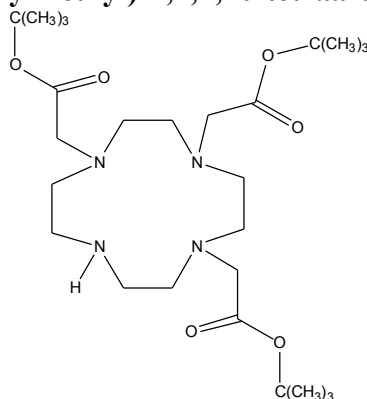

0.750 g (4.21 mmol) of 1,4,7,10-Tetraazacyclododecane (cyclen) and 1.17 g of NaHCO<sub>3</sub> (13.90 mmol) were stirred on 25 mL of dried CH<sub>3</sub>CN at 0°C. 2.03 mL (13.90 mmol) of *tert*-butyl bromoacetate was added dropwise. The reaction was left to react for 30 hours. Protected cyclen was separated by column chromatography (SiO<sub>2</sub> CH<sub>2</sub>Cl<sub>2</sub>:MeOH). Yield:46 %

NMR:  $\delta_{\text{H}}$ :1.44(27H, s, *tert*-Bu), 2.87(4H, s, CH<sub>2</sub>), 2.90(8H, s, CH<sub>2</sub>), 3.08(4H, s, CH<sub>2</sub>-amine), 3.27(2H, s, CH<sub>2</sub>-CO<sub>2</sub>), 3.36(4H, s, CH<sub>2</sub>-CO<sub>2</sub>), 9.96(1H, s, NH).  $\delta_{\text{C}}$  28.5, 47.8, 51.7, 58.5, 82.0,170.0, 170.8; *m/z* (CI) 515(MH<sup>+</sup>).

### *N*-{3-[4,7,10-Tris(*tert*-butoxycarbonylmethyl)-1,4,7,10-tetraazacyclododecan-1-yl]propyl}trimethoxysilane

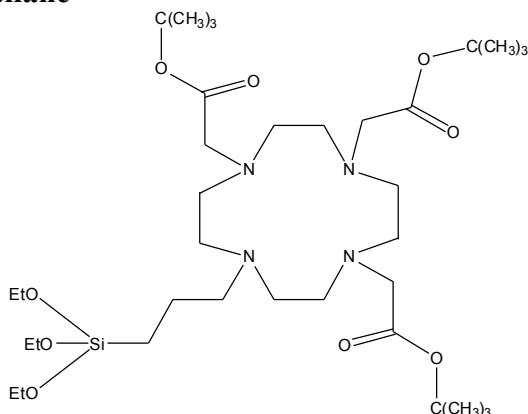

0.100 g (0.94553 mmol) of protected cyclen and 0.26 g (1.94553 mmol) of K<sub>2</sub>CO<sub>3</sub> were stirred in dry CH<sub>3</sub>CN under reflux. 39.27  $\mu$ L (0.94553 mmol) of (3-iodopropyl)trimethoxysilane were added and the mixture refluxed for 48 hours. After 48 h se solution was cooled at room temperature and the solvent vacuum removed. The oil obtained is used for the next step without further purification.

### Grafted cyclen-silane

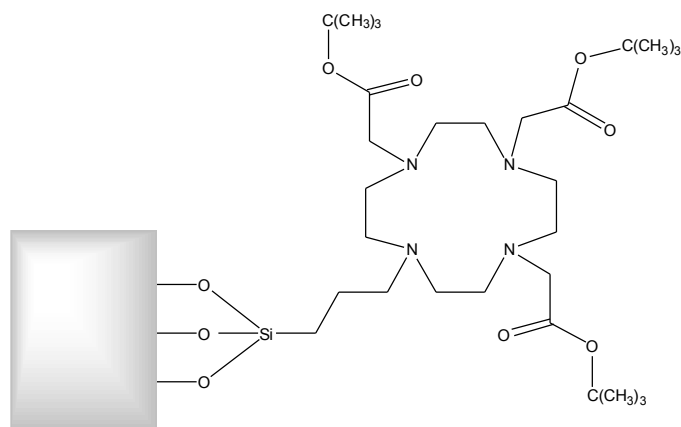

The oil obtained from the previous step was dissolved in toluene. To this solution was added 0.291 mmol of boehmite and the mixture refluxed for 24 hours. The solid is separated by centrifugation at 4000 rpm for 10 minutes and washed 4 times with EtOH. No unreacted (3-iodopropyl)trimethoxysilane or the hydrolyzed form was found in the nanoparticles as measured later on by EDX.

### Desprotected cyclen

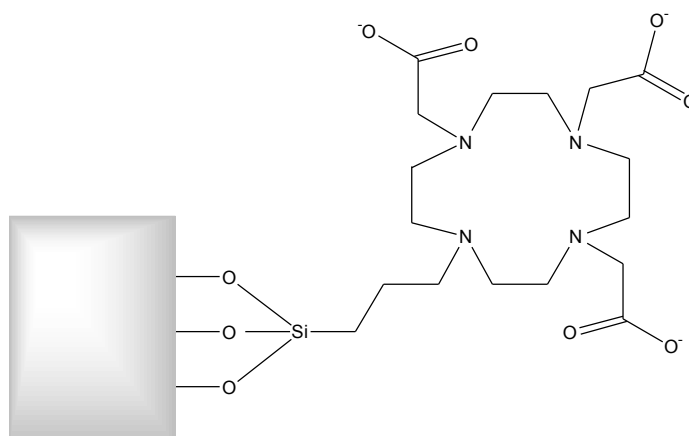

The solid obtained is stirred for 3-4 hours in a mixture of  $\text{CH}_2\text{Cl}_2$ :TFA (3:1). The acid is removed by vacuum evaporation. The traces of acid are removed by washing and centrifuging the solid with  $\text{CH}_2\text{Cl}_2$ ,  $\text{CH}_2\text{Cl}_2/\text{EtOH}$  and EtOH.

### Lanthanide complexes

The solid obtained is dispersed in 25 mL of  $\text{CH}_3\text{CN}$  and an equimolar quantity of lanthanide chloride is added.

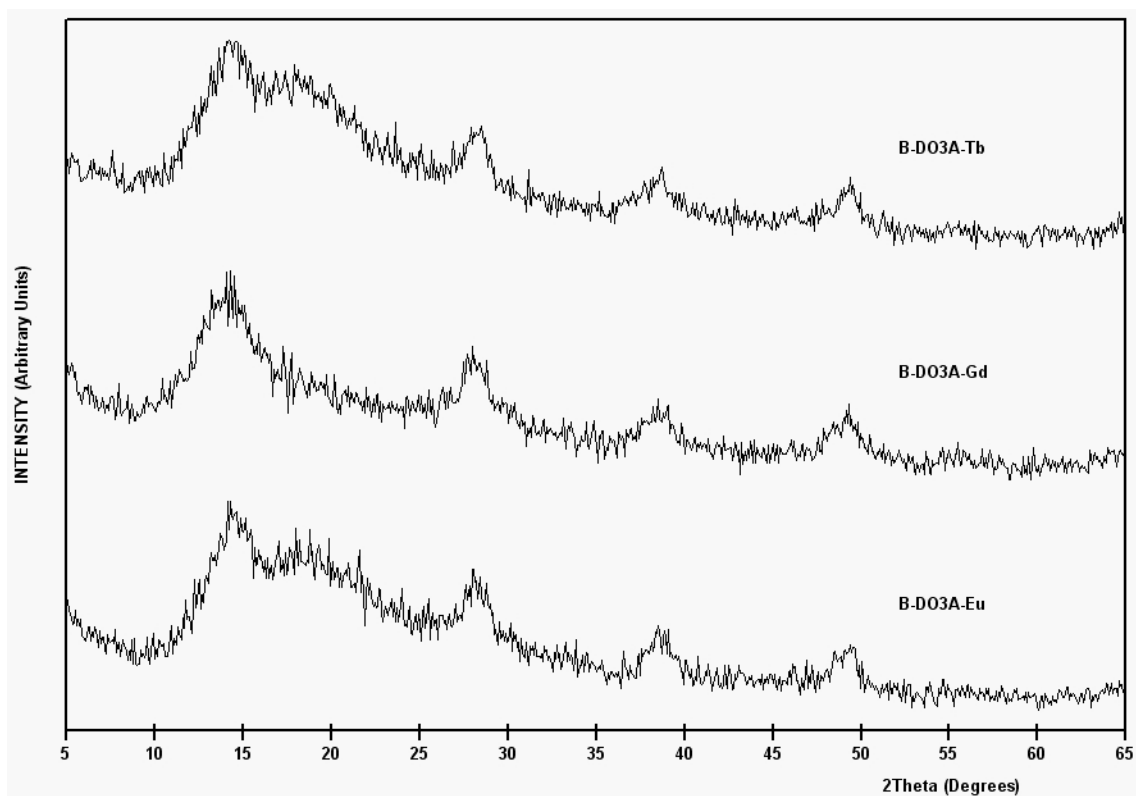

DRX reflection pattern for Tb-boehmite, Gd-boehmite and Eu-boehmite.

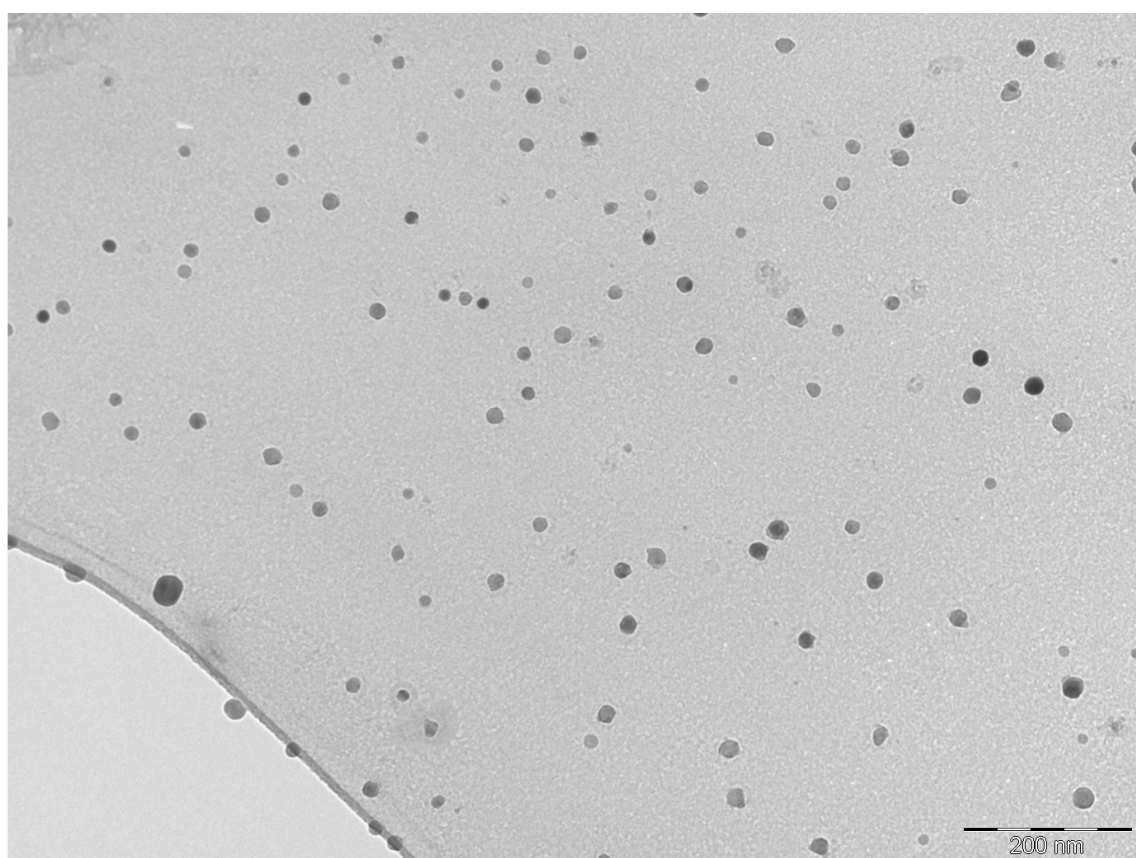

TEM micrograph of Gd-boehmite nanoparticles.

### Lifetime measurements

|                       | $\tau(\text{H}_2\text{O})/\text{ms}$ | $\tau(\text{D}_2\text{O})/\text{ms}$ | $q$               |
|-----------------------|--------------------------------------|--------------------------------------|-------------------|
| Eu-Boeh pH 2          | 0.42                                 | 1.01                                 | 1.34              |
|                       | 0.47                                 | 1.49                                 | 1.45 <sup>a</sup> |
| Eu-Boeh pH 2 + NaCl   | 0.38                                 | 1.36                                 | 1.97              |
| Eu-Boeh pH 5.5        | 0.35                                 | 1.25                                 | 2.17              |
|                       | 0.35                                 | 1.26                                 | 2.18 <sup>b</sup> |
| Eu-Boeh pH 5.5 + NaCl | 0.37                                 | 1.12                                 | 1.87              |
| Tb-Boeh pH 2          | 0.85                                 | 1.24                                 | 1.55              |
| Tb-Boeh pH 2 + NaCl   | 0.77                                 | 1.14                                 | 1.81              |
| Tb-Boeh pH 5.5        | 0.82                                 | 1.24                                 | 1.76              |
| Tb-Boeh pH 5.5 + NaCl | 0.86                                 | 1.30                                 | 1.67              |

<sup>a</sup>measured 3 hours after being prepared

<sup>b</sup>measured 2 weeks after being prepared

### Relaxivity calculations

|                            | $r_{1p}$ (mM <sup>-1</sup> s <sup>-1</sup> ) in situ | $r_{1p}$ (mM <sup>-1</sup> s <sup>-1</sup> ) 1 month later |
|----------------------------|------------------------------------------------------|------------------------------------------------------------|
| Gd-Boeh pH 2               | 11.71 (2)                                            | 14.95 (8)                                                  |
| Gd-Boeh pH 2 + NaCl 0.9%   | 3.55 (2)                                             | 10.46 (8)                                                  |
| Gd-Boeh pH 4.3             | 1.75 (2)                                             | 1.63 (2)                                                   |
| Gd-Boeh pH 4.3 + NaCl 0.9% | 1.33 (2)                                             | 1.06 (2)                                                   |
| Gd-Boeh pH 7.5             | 1.49 (2)                                             | 1.04 (2)                                                   |
| Gd-Boeh pH 7.5 + NaCl 0.9% | 1.32 (2)                                             | 1.21 (2)                                                   |

In parenthesis the  $q$  value measured

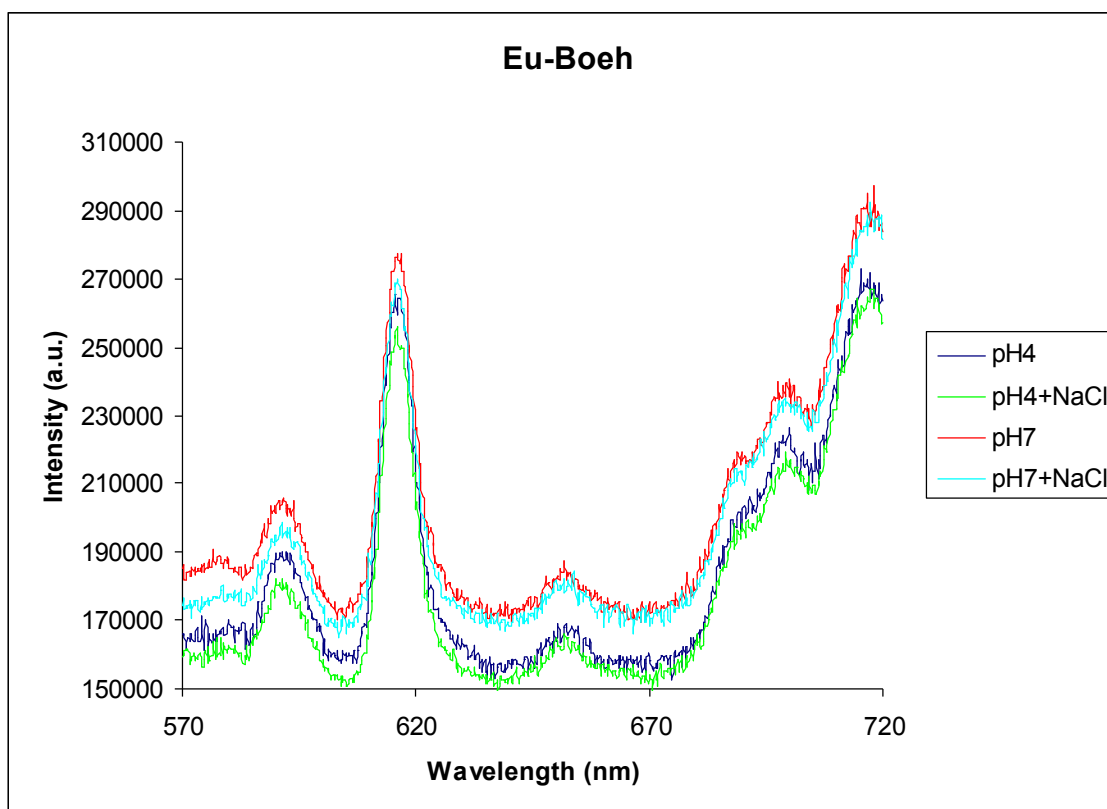

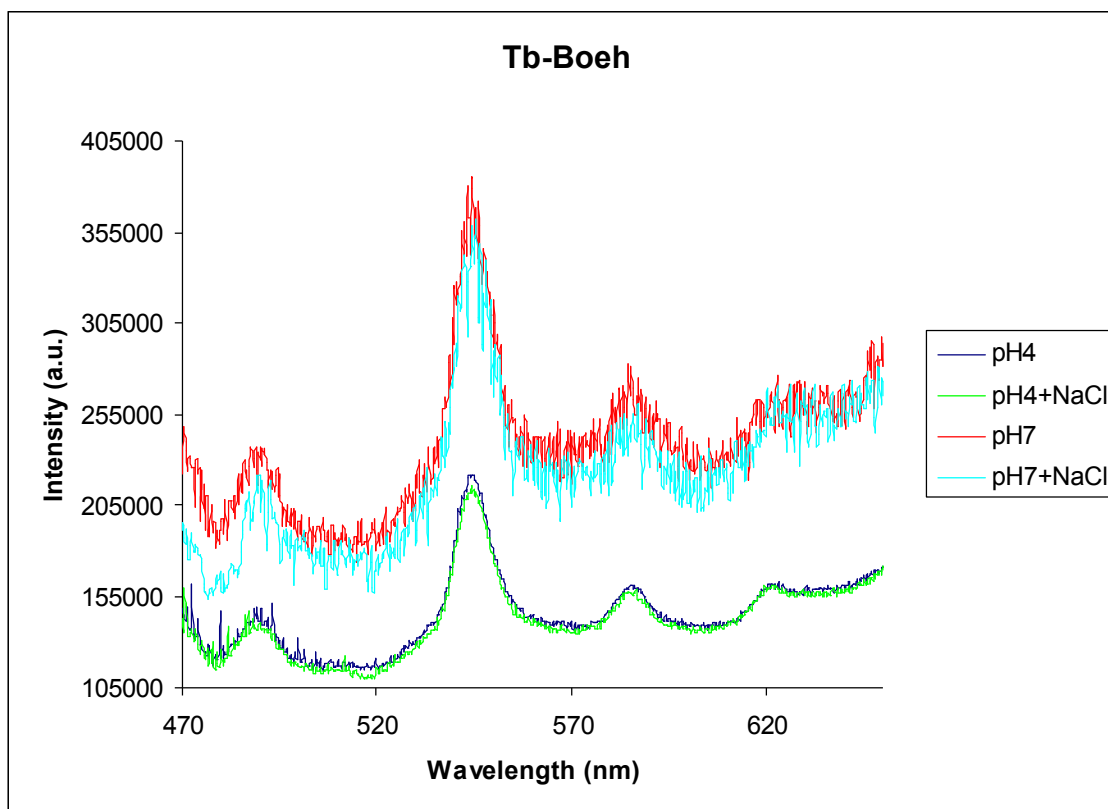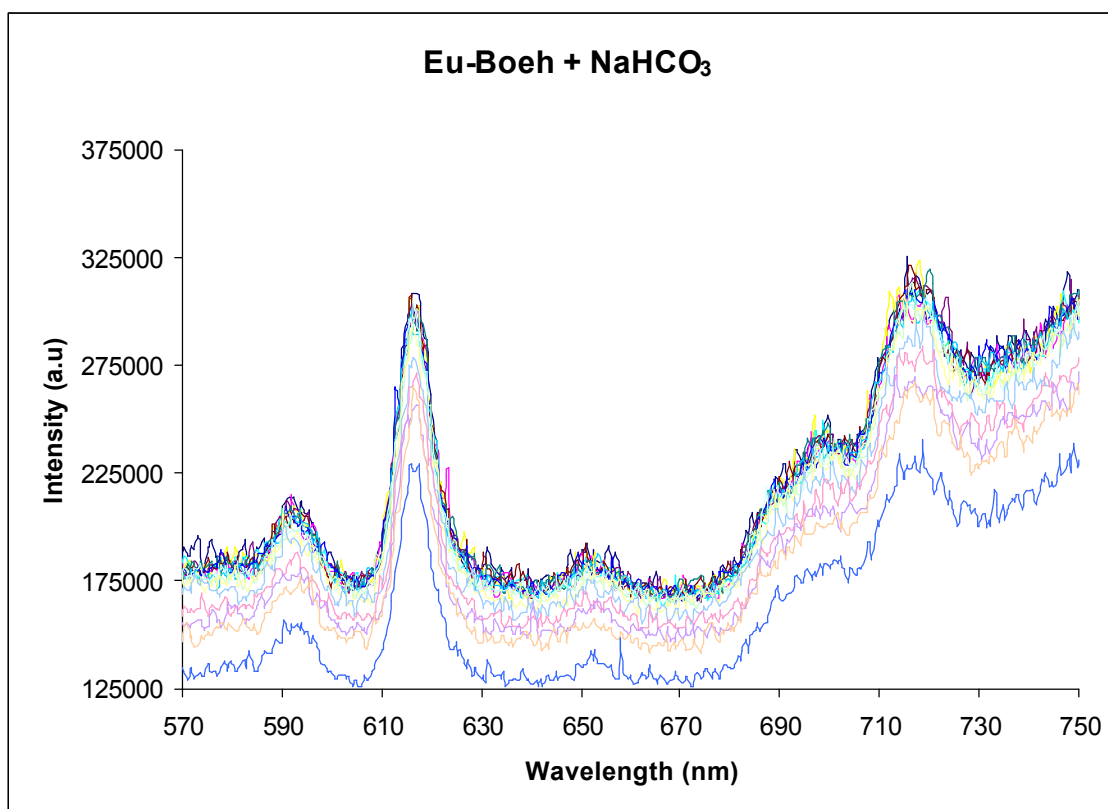

Supplement: b704650b.pdf [file b704650b.pdf]
